# Supplementary material for: Reduction of human Alzheimer’s disease risk and reversal of mouse model cognitive deficit with nucleoside analog use
Source: PubMed Central journal article supplement — medRxiv. 2023 Mar 20:2023.03.17.23287375. Preprint. [Version 1] doi: 10.1101/2023.03.17.23287375 (PMC10055589; doi:10.1101/2023.03.17.23287375), 2023-03-20
Supplement: media-1.pdf [file media-1.pdf]

**Supplementary Table 1. VA Original group baseline characteristics.**

| Variable                     |               | NRTI unexposed<br>N=43493 | NRTI exposed<br>N=19685 | P value |
|------------------------------|---------------|---------------------------|-------------------------|---------|
| HIV                          |               | 6674(15.345%)             | 14864(75.509%)          | <0.001  |
| HBV                          |               | 37200(85.531%)            | 6886(34.981%)           | <0.001  |
| Age                          |               | 61.77(9.713)              | 59.9(9.201)             | <0.001  |
| Race                         | Black         | 12376(28.455%)            | 7928(40.274%)           | <0.001  |
|                              | Other/unknown | 5661(13.016%)             | 2173(11.039%)           |         |
|                              | White         | 25456(58.529%)            | 9584(48.687%)           |         |
| Sex                          | Female        | 1189(2.734%)              | 349(1.773%)             | <0.001  |
|                              | Male          | 42304(97.266%)            | 19336(98.227%)          |         |
| Charlson comorbidity         |               | 1.52(2.081)               | 0.75(1.598)             | <0.001  |
| Smoker                       |               | 18147(41.724%)            | 8193(41.621%)           | 0.814   |
| BMI                          | <18.5         | 1028(2.364%)              | 746(3.79%)              | <0.001  |
|                              | 18.5-24.9     | 12008(27.609%)            | 7932(40.295%)           |         |
|                              | 25-29.9       | 16006(36.801%)            | 6643(33.747%)           |         |
|                              | 30+           | 13846(31.835%)            | 4074(20.696%)           |         |
|                              | Missing       | 605(1.391%)               | 290(1.473%)             |         |
| Pure hypercholesterolemia    |               | 2249(5.171%)              | 381(1.935%)             | <0.001  |
| Hypertriglyceridemia         |               | 2126(4.888%)              | 510(2.591%)             | <0.001  |
| Hyperlipidemia               |               | 10760(24.74%)             | 2433(12.36%)            | <0.001  |
| Ischemic heart disease       |               | 6124(14.08%)              | 1256(6.38%)             | <0.001  |
| Other Heart disease          |               | 5688(13.078%)             | 1043(5.298%)            | <0.001  |
| Hypertension                 |               | 16616(38.204%)            | 3597(18.273%)           | <0.001  |
| T2DM                         |               | 7428(17.079%)             | 1543(7.838%)            | <0.001  |
| Cerebral infarction          |               | 262(0.602%)               | 51(0.259%)              | <0.001  |
| Atrial fibrillation          |               | 1104(2.538%)              | 140(0.711%)             | <0.001  |
| Hypothyroidism               |               | 1244(2.86%)               | 193(0.98%)              | <0.001  |
| Hyperthyroidism              |               | 133(0.306%)               | 28(0.142%)              | <0.001  |
| Depression                   |               | 7662(17.617%)             | 1547(7.859%)            | <0.001  |
| TBI                          |               | 195(0.448%)               | 41(0.208%)              | <0.001  |
| Alcohol dependence           |               | 5772(13.271%)             | 924(4.694%)             | <0.001  |
| Parkinson's disease          |               | 170(0.391%)               | 16(0.081%)              | <0.001  |
| Generalized anxiety disorder |               | 653(1.501%)               | 137(0.696%)             | <0.001  |
| Chronic kidney disease       |               | 1735(3.989%)              | 360(1.829%)             | <0.001  |
| Year of HIV/HBV dx           |               | 2008.62(6.327)            | 2008.09(6.71)           | <0.001  |
| NRTI use (years)             |               | 0(0)                      | 5.8(5.1)                | <0.001  |

HIV, Human immunodeficiency virus. HBV, Hepatitis B virus. BMI, body mass index. T2DM, type 2 diabetes mellitus. TBI, traumatic brain injury. NRTI, nucleoside reverse transcriptase inhibitor.

**Supplementary Table 2. Marketscan Original group baseline characteristics.**

|                              | NRTI unexposed<br>N=136019 | NRTI exposed<br>N=63986 | P value        | Standardized<br>difference |       |
|------------------------------|----------------------------|-------------------------|----------------|----------------------------|-------|
| HIV                          | 44340(32.84%)              | 50918(79.577%)          | <0.001         | 1.07                       |       |
| HBV                          | 92534(68.534%)             | 15786(24.671%)          | <0.001         | 0.977                      |       |
| Age                          | 59.36(7.23)                | 56.92(5.1)              | <0.001         | 0.39                       |       |
| Sex                          | Male                       | 80013(59.261%)          | 51424(80.368%) | <0.001                     | 0.472 |
|                              | Female                     | 55006(40.739%)          | 12562(19.632%) |                            | 0.472 |
| Charlson comorbidity         | 1.23(2.201)                | 0.37(1.166)             | <0.001         | 0.486                      |       |
| Smoker                       | 8316(6.159%)               | 1164(1.819%)            | <0.001         | 0.226                      |       |
| Obese                        | 7743(5.735%)               | 912(1.425%)             | <0.001         | 0.234                      |       |
| Pure hypercholesterolemia    | 12808(9.486%)              | 1483(2.318%)            | <0.001         | 0.309                      |       |
| Hypertriglyceridemia         | 9761(7.229%)               | 1445(2.258%)            | <0.001         | 0.232                      |       |
| Hyperlipidemia               | 26873(19.903%)             | 3852(6.02%)             | <0.001         | 0.423                      |       |
| Ischemic heart disease       | 12397(9.182%)              | 1697(2.652%)            | <0.001         | 0.277                      |       |
| Other Heart disease          | 17521(12.977%)             | 1958(3.06%)             | <0.001         | 0.37                       |       |
| Hypertension                 | 47902(35.478%)             | 7751(12.114%)           | <0.001         | 0.571                      |       |
| T2DM                         | 23601(17.48%)              | 3831(5.987%)            | <0.001         | 0.363                      |       |
| Cerebral infarction          | 1626(1.204%)               | 173(0.27%)              | <0.001         | 0.104                      |       |
| Atrial fibrillation          | 4276(3.167%)               | 411(0.642%)             | <0.001         | 0.191                      |       |
| Hypothyroidism               | 11141(8.251%)              | 1010(1.578%)            | <0.001         | 0.313                      |       |
| Hyperthyroidism              | 1244(0.921%)               | 146(0.228%)             | <0.001         | 0.095                      |       |
| Depression                   | 8221(6.089%)               | 1726(2.697%)            | <0.001         | 0.166                      |       |
| TBI                          | 596(0.441%)                | 68(0.106%)              | <0.001         | 0.06                       |       |
| Alcohol dependence           | 1332(0.987%)               | 177(0.277%)             | <0.001         | 0.087                      |       |
| Parkinson's disease          | 372(0.276%)                | 44(0.069%)              | <0.001         | 0.045                      |       |
| Generalized anxiety disorder | 3592(2.66%)                | 905(1.414%)             | <0.001         | 0.092                      |       |
| Chronic kidney disease       | 9115(6.751%)               | 1127(1.761%)            | <0.001         | 0.248                      |       |
| Year of HIV/HBV dx           | 2011.99(3.788)             | 2012.79(4.301)          | <0.001         | 0.196                      |       |
| NRTI duration (years)        | 0(0)                       | 2.4(2.307)              | <0.001         | 1.470                      |       |

HIV, Human immunodeficiency virus. HBV, Hepatitis B virus. BMI, body mass index. T2DM, type 2 diabetes mellitus. TBI, traumatic brain injury. NRTI, nucleoside reverse transcriptase inhibitor.

**Supplementary Table 3. VA Cox models, hazard of AD: Time-dependent NRTI exposure**

|                              | Original group<br>HR(95% CI) | PS matched<br>HR(95% CI) |
|------------------------------|------------------------------|--------------------------|
| NRTI use per year            | 0.915 (0.89-0.94)            | 0.907 (0.862-0.955)      |
| Age                          | 1.027 (1.025-1.03)           | 1.033 (1.027-1.038)      |
| Race                         | Black vs. white              | 0.934 (0.793-1.099)      |
|                              | Other/Unknown vs. white      | 0.912 (0.717-1.159)      |
| Sex                          | Female vs. male              | 0.445 (0.23-0.862)       |
| Charlson comorbidity         |                              | 0.542 (0.132-2.227)      |
| BMI                          | 18.5-24.9 vs. missing        | 1.184 (1.137-1.234)      |
|                              | 25-29.9 vs. missing          | 1 (0.513-1.952)          |
|                              | 30+ vs. missing              | 3.143 (0.433-22.82)      |
|                              | <18.5 vs. missing            | 0.83 (0.426-1.614)       |
| Smoker                       |                              | 0.63 (0.322-1.235)       |
| Pure hypercholesterolemia    |                              | 1.039 (0.448-2.409)      |
| Hypertriglyceridemia         |                              | 0.427 (0.361-0.505)      |
| Hyperlipidemia               |                              | 0.426 (0.295-0.614)      |
| Ischemic heart disease       |                              | 1.245 (0.958-1.618)      |
| Other Heart disease          |                              | 1.14 (0.583-2.228)       |
| Hypertension                 |                              | 0.913 (0.637-1.307)      |
| T2DM                         |                              | 1.208 (0.56-2.606)       |
| Cerebral infarction          |                              | 0.916 (0.763-1.099)      |
| Atrial fibrillation          |                              | 0.892 (0.595-1.335)      |
| Hypothyroidism               |                              | 1.142 (0.694-1.88)       |
| Hyperthyroidism              |                              | 1.217 (0.946-1.565)      |
| Depression                   |                              | 1.21 (1.027-1.426)       |
| TBI                          |                              | 1.378 (0.976-1.945)      |
| Alcohol dependence           |                              | 1.097 (0.894-1.345)      |
| Parkinson's disease          |                              | 1.081 (0.686-1.703)      |
| Generalized anxiety disorder |                              | 1.955 (1.035-3.693)      |
| Chronic kidney disease       |                              | 7.49 (2.662-21.073)      |
|                              |                              | 1.232 (0.811-1.872)      |
|                              |                              | 0.359 (0.072-1.784)      |
|                              |                              | 1.205 (0.825-1.761)      |
|                              |                              | 1.391 (0.55-3.52)        |
|                              |                              | 0.953 (0.303-2.992)      |
|                              |                              | 1.955 (0.251-15.222)     |
|                              |                              | 1.099 (0.898-1.346)      |
|                              |                              | 0.999 (0.612-1.632)      |
|                              |                              | 1.805 (0.746-4.367)      |
|                              |                              | -                        |
|                              |                              | 0.87 (0.665-1.139)       |
|                              |                              | 0.707 (0.333-1.502)      |
|                              |                              | -                        |
|                              |                              | -                        |
|                              |                              | 1.207 (0.718-2.029)      |
|                              |                              | -                        |
|                              |                              | 0.599 (0.395-0.909)      |
|                              |                              | 0.566 (0.218-1.473)      |

HIV, Human immunodeficiency virus. HBV, Hepatitis B virus. BMI, body mass index. T2DM, type 2 diabetes mellitus. TBI, traumatic brain injury. NRTI, nucleoside reverse transcriptase inhibitor.

**Supplementary Table 4. Marketscan Cox models, hazard of AD: Time-dependent NRTI exposure**

|                              | Original group<br>HR (95% CI) | PS matched<br>HR (95% CI) |
|------------------------------|-------------------------------|---------------------------|
| NRTI use per year            | 0.894 (0.845-0.947)           | 0.877 (0.821-0.936)       |
| Age                          | 1.145 (1.138-1.152)           | 1.163 (1.149-1.177)       |
| Sex Male vs. Female          | 0.876 (0.764-1.005)           | 0.897 (0.689-1.169)       |
| Smoker                       | 1.188 (0.902-1.563)           | 1.995 (1.063-3.746)       |
| Obesity                      | 0.956 (0.682-1.34)            | 0.962 (0.353-2.621)       |
| Charlson comorbidity         | 1.047 (1.011-1.084)           | 1.095 (1.006-1.191)       |
| Pure hypercholesterolemia    | 0.882 (0.713-1.09)            | 1.119 (0.648-1.93)        |
| Hypertriglyceridemia         | 0.965 (0.736-1.267)           | 0.566 (0.224-1.431)       |
| Hyperlipidemia               | 0.962 (0.812-1.14)            | 0.953 (0.639-1.42)        |
| Ischemic heart disease       | 1.163 (0.964-1.403)           | 1.135 (0.748-1.724)       |
| Other Heart disease          | 1.225 (1.019-1.474)           | 0.958 (0.632-1.452)       |
| Hypertension                 | 1.014 (0.855-1.201)           | 0.839 (0.6-1.173)         |
| T2DM                         | 1.383 (1.163-1.644)           | 1.288 (0.872-1.9)         |
| Cerebral infarction          | 1.499 (1.066-2.109)           | 2.879 (1.197-6.925)       |
| Atrial fibrillation          | 0.657 (0.505-0.854)           | 0.799 (0.352-1.814)       |
| Hypothyroidism               | 1.036 (0.834-1.287)           | 1.177 (0.615-2.254)       |
| Hyperthyroidism              | 0.876 (0.425-1.803)           | 0.886 (0.112-6.994)       |
| Depression                   | 1.709 (1.359-2.149)           | 1.685 (0.98-2.897)        |
| TBI                          | 1.396 (0.706-2.761)           | 0.674 (0.055-8.199)       |
| Alcohol dependence           | 1.673 (0.934-2.995)           | 0 (0-0)                   |
| Parkinson's disease          | 4.987 (3.4-7.313)             | 9.43 (4.904-18.133)       |
| Generalized anxiety disorder | 1.21 (0.801-1.828)            | 1.079 (0.365-3.189)       |
| Chronic kidney disease       | 1.06 (0.851-1.321)            | 0.778 (0.42-1.44)         |
| Year of diagnosis            | 0.957 (0.936-0.978)           | 0.972 (0.934-1.011)       |

HIV, Human immunodeficiency virus. HBV, Hepatitis B virus. BMI, body mass index. T2DM, type 2 diabetes mellitus. TBI, traumatic brain injury. NRTI, nucleoside reverse transcriptase inhibitor.

**Supplementary Table 5. VA: Propensity Score-Matched cohorts baseline characteristics.**

|                              | Variable      | NRTI<br>unexposed<br>N=8214 | NRTI<br>exposed<br>N=8214 | P value | Standardized<br>difference |
|------------------------------|---------------|-----------------------------|---------------------------|---------|----------------------------|
| HIV                          |               | 3693(44.96%)                | 3695(44.98%)              | 0.987   | 0                          |
| HBV                          |               | 4714(57.39%)                | 4693(57.13%)              | 0.752   | 0.005                      |
| Age                          |               | 61.54(9.21)                 | 61.91(9.25)               | <0.001  | 0.04                       |
| Race                         | Black         | 2692(32.77%)                | 2851(34.71%)              | <0.001  | 0.041                      |
|                              | Other/unknown | 1154(14.05%)                | 1310(15.95%)              |         |                            |
|                              | White         | 4368(53.18%)                | 4053(49.34%)              |         |                            |
| Sex                          | Female        | 178(2.17%)                  | 175(2.13%)                | 0.914   | 0.002                      |
|                              | Male          | 8036(97.83%)                | 8039(97.87%)              |         |                            |
| Charlson comorbidity         |               | 1.12(1.83)                  | 1.25(1.99)                | 0.001   | 0.068                      |
| Smoker                       |               | 2992(36.43%)                | 2993(36.44%)              | 1       | 0                          |
| BMI                          | <18.5         | 227(2.76%)                  | 303(3.69%)                | <0.001  | 0.052                      |
|                              | 18.5-24.9     | 2551(31.06%)                | 2755(33.54%)              |         |                            |
|                              | 25-29.9       | 2971(36.17%)                | 2769(33.71%)              |         |                            |
|                              | 30+           | 2327(28.33%)                | 2239(27.26%)              |         |                            |
|                              | Missing       | 138(1.68%)                  | 148(1.80%)                |         |                            |
| Pure hypercholesterolemia    |               | 192(2.34%)                  | 236(2.87%)                | 0.035   | 0.034                      |
| Hypertriglyceridemia         |               | 286(3.48%)                  | 327(3.98%)                | 0.1     | 0.026                      |
| Hyperlipidemia               |               | 1501(18.27%)                | 1665(20.27%)              | 0.001   | 0.051                      |
| Ischemic heart disease       |               | 727(8.85%)                  | 822(10.00%)               | 0.012   | 0.04                       |
| Other Heart disease          |               | 561(6.83%)                  | 602(7.33%)                | 0.224   | 0.019                      |
| Hypertension                 |               | 2099(25.55%)                | 2153(26.21%)              | 0.345   | 0.015                      |
| T2DM                         |               | 916(11.15%)                 | 937(11.41%)               | 0.622   | 0.008                      |
| Cerebral infarction          |               | 31(0.377%)                  | 28(0.34%)                 | 0.794   | 0.006                      |
| Atrial fibrillation          |               | 58(0.71%)                   | 61(0.74%)                 | 0.854   | 0.004                      |
| Hypothyroidism               |               | 133(1.62%)                  | 108(1.32%)                | 0.119   | 0.025                      |
| Hyperthyroidism              |               | 19(0.23%)                   | 14(0.17%)                 | 0.486   | 0.014                      |
| Depression                   |               | 831(10.12%)                 | 866(10.54%)               | 0.383   | 0.014                      |
| TBI                          |               | 23(0.28%)                   | 28(0.34%)                 | 0.575   | 0.011                      |
| Alcohol dependence           |               | 545(6.64%)                  | 444(5.41%)                | 0.001   | 0.052                      |
| Parkinson's disease          |               | 4(0.049%)                   | 8(0.097%)                 | 0.386   | 0.018                      |
| Generalized anxiety disorder |               | 65(0.79%)                   | 75(0.91%)                 | 0.445   | 0.013                      |
| Chronic kidney disease       |               | 196(2.39%)                  | 213(2.59%)                | 0.423   | 0.013                      |
| Year of HIV/HBV dx           |               | 2009.27(6.67)               | 2009.65(6.74)             | 0.001   | 0.057                      |
| NRTI use (year)              |               | 0(0)                        | 4.44(4.48)                | <0.001  | NA                         |

HIV, Human immunodeficiency virus. HBV, Hepatitis B virus. BMI, body mass index. T2DM, type 2 diabetes mellitus. TBI, traumatic brain injury. NRTI, nucleoside reverse transcriptase inhibitor.

**Supplementary Table 6. Truven: Propensity Score Matched cohorts baseline characteristics.**

|                              | NRTI unexposed<br>N=48297 | NRTI exposed<br>N=48297 | P<br>value | Standardized<br>difference |
|------------------------------|---------------------------|-------------------------|------------|----------------------------|
| HIV                          | 35073(72.619%)            | 35229(72.942%)          | 0.263      | 0.007                      |
| HBV                          | 14799(30.642%)            | 14671(30.377%)          | 0.375      | 0.006                      |
| Age                          | 57.5(5.67)                | 56.64(5.446)            | <0.001     | 0.155                      |
| Sex                          |                           |                         |            |                            |
| Male                         | 35513(73.53%)             | 36497(75.568%)          | <0.001     | 0.047                      |
| Female                       | 12784(26.47%)             | 11800(24.432%)          | <0.001     | 0.047                      |
| Charlson comorbidity         | 0.5(1.295)                | 0.49(1.314)             | <0.001     | 0.008                      |
| Smoker                       | 1082(2.24%)               | 1158(2.398%)            | 0.109      | 0.01                       |
| Obese                        | 932(1.93%)                | 908(1.88%)              | 0.588      | 0.004                      |
| Pure hypercholesterolemia    | 1541(3.191%)              | 1476(3.056%)            | 0.236      | 0.008                      |
| Hypertriglyceridemia         | 1372(2.841%)              | 1415(2.93%)             | 0.419      | 0.005                      |
| Hyperlipidemia               | 3775(7.816%)              | 3816(7.901%)            | 0.632      | 0.003                      |
| Ischemic heart disease       | 1635(3.385%)              | 1651(3.418%)            | 0.79       | 0.002                      |
| Other Heart disease          | 2014(4.17%)               | 1955(4.048%)            | 0.347      | 0.006                      |
| Hypertension                 | 7851(16.256%)             | 7581(15.697%)           | 0.0182     | 0.015                      |
| T2DM                         | 3844(7.959%)              | 3796(7.86%)             | 0.575      | 0.004                      |
| Cerebral infarction          | 158(0.327%)               | 172(0.356%)             | 0.473      | 0.005                      |
| Atrial fibrillation          | 422(0.874%)               | 407(0.843%)             | 0.625      | 0.003                      |
| Hypothyroidism               | 1079(2.234%)              | 1008(2.087%)            | 0.121      | 0.01                       |
| Hyperthyroidism              | 133(0.275%)               | 146(0.302%)             | 0.472      | 0.005                      |
| Depression                   | 1391(2.88%)               | 1641(3.398%)            | <0.001     | 0.03                       |
| TBI                          | 62(0.128%)                | 68(0.141%)              | 0.661      | 0.004                      |
| Alcohol dependence           | 152(0.315%)               | 175(0.362%)             | 0.223      | 0.008                      |
| Parkinson's disease          | 48(0.099%)                | 44(0.091%)              | 0.754      | 0.003                      |
| Generalized anxiety disorder | 693(1.435%)               | 875(1.812%)             | <0.001     | 0.03                       |
| Chronic kidney disease       | 1106(2.29%)               | 1101(2.28%)             | 0.931      | 0.001                      |
| Year of HIV/HBV dx           | 2011.93(3.924)            | 2012.43(4.13)           | <0.001     | 0.124                      |
| NRTI duration (years)        | 0(0)                      | 2.43 (2.33)             | <0.001     | NA                         |

HIV, Human immunodeficiency virus. HBV, Hepatitis B virus. BMI, body mass index. T2DM, type 2 diabetes mellitus. TBI, traumatic brain injury. NRTI, nucleoside reverse transcriptase inhibitor.

**Supplementary Table 7. VA Competing risk model, death as a competing risk. Sub-distribution hazard ratios (sHR).**

|                              | Original group<br>sHR(95% CI) | PS matched<br>sHR(95% CI) |
|------------------------------|-------------------------------|---------------------------|
| NRTI use per year            | 0.456 (0.371-0.56)            | 0.514 (0.374-0.706)       |
| Age                          | 1.027 (1.024-1.03)            | 1.032 (1.023-1.04)        |
| Race                         |                               |                           |
| Black vs. white              | 1.027 (0.869-1.213)           | 0.9712 (0.994-0.706)      |
| Other/Unknown vs. white      | 0.692 (0.539-0.888)           | 0.8962 (1.03-0.664)       |
| Sex                          |                               |                           |
| Female vs. white             | 0.522 (0.261-1.046)           | 0.6246 (0.699-0.167)      |
| Charlson comorbidity         | 1.016 (0.975-1.059)           | 1.002 (0.918-1.095)       |
| BMI                          |                               |                           |
| 18.5-24.9 vs. missing        | 1.241 (0.631-2.443)           | 3.613 (0.497-26.251)      |
| 25-29.9 vs. missing          | 1.235 (0.63-2.421)            | 3.142 (0.432-22.875)      |
| 30+ vs. missing              | 0.979 (0.496-1.929)           | 2.213 (0.3-16.329)        |
| <18.5 vs. missing            | 0.904 (0.387-2.108)           | 1.961 (0.202-19.032)      |
| Smoker                       | 0.509 (0.43-0.603)            | 0.49 (0.333-0.72)         |
| Pure hypercholesterolemia    | 1.462 (1.118-1.911)           | 1.47 (0.721-2.997)        |
| Hypertriglyceridemia         | 0.977 (0.675-1.415)           | 1.33 (0.628-2.82)         |
| Hyperlipidemia               | 0.996 (0.832-1.193)           | 1.002 (0.678-1.48)        |
| Ischemic heart disease       | 0.939 (0.746-1.183)           | 0.99 (0.59-1.66)          |
| Other Heart disease          | 0.948 (0.729-1.232)           | 1.313 (0.711-2.427)       |
| Hypertension                 | 1.151 (0.973-1.363)           | 1.377 (0.944-2.009)       |
| T2DM                         | 1.146 (0.936-1.403)           | 1.099 (0.687-1.758)       |
| Cerebral infarction          | 1.93 (1.003-3.712)            | 6.054 (2.028-18.069)      |
| Atrial fibrillation          | 1.207 (0.787-1.852)           | 0.435 (0.061-3.123)       |
| Hypothyroidism               | 1.15 (0.783-1.69)             | 1.456 (0.571-3.713)       |
| Hyperthyroidism              | 1.095 (0.345-3.469)           | 2.139 (0.242-18.92)       |
| Depression                   | 1.129 (0.916-1.393)           | 1.159 (0.695-1.934)       |
| TBI                          | 1.587 (0.65-3.876)            | -                         |
| Alcohol dependence           | 0.727 (0.555-0.953)           | 0.621 (0.272-1.421)       |
| Parkinson's disease          | 3.662 (2.088-6.423)           | -                         |
| Generalized anxiety disorder | 1.273 (0.748-2.166)           | -                         |
| Chronic kidney disease       | 0.562 (0.367-0.862)           | 0.576 (0.214-1.549)       |

HIV, Human immunodeficiency virus. HBV, Hepatitis B virus. BMI, body mass index. T2DM, type 2 diabetes mellitus. TBI, traumatic brain injury. NRTI, nucleoside reverse transcriptase inhibitor.

**Supplementary Table 8. Morris Water Maze, Mixed effect model results.**

| <i>Predictors</i>                  | <i>Estimates</i> | <b>Time</b>    |                |
|------------------------------------|------------------|----------------|----------------|
|                                    |                  | <i>CI</i>      | <i>p</i>       |
| (Intercept)                        | 56.59            | 50.24 – 62.95  | < <b>0.001</b> |
| 24-week 5xFAD                      | 8.42             | 1.81 – 15.02   | <b>0.013</b>   |
| 36-week 5xFAD – K-9                | -10.84           | -18.48 – -3.20 | <b>0.006</b>   |
| 36-week 5xFAD - PBS                | 9.21             | 1.57 – 16.85   | <b>0.018</b>   |
| WT                                 | -9               | -16.63 – -1.37 | <b>0.021</b>   |
| day                                | -8.37            | -9.71 – -7.02  | < <b>0.001</b> |
| <b>Random Effects</b>              |                  |                |                |
| $\sigma^2$                         | 278.98           |                |                |
| $\tau_{00}$ Mouse.ID               | 20.24            |                |                |
| ICC                                | 0.07             |                |                |
| $N_{\text{Mouse.ID}}$              | 30               |                |                |
| Observations                       | 478              |                |                |
| Marginal $R^2$ / Conditional $R^2$ | 0.345 / 0.389    |                |                |

\*All groups compared to reference level of 13-week 5xFAD mice



**Supplementary Table 9. Morris Water Maze, Contrast estimates**

| <i>Contrast</i>                             | <i>Estimates</i> | <b>Time</b>    |                  |
|---------------------------------------------|------------------|----------------|------------------|
|                                             |                  | <i>CI</i>      | <i>p</i>         |
| 36-week 5xFAD – K-9 vs. 36-week 5xFAD - PBS | -20.05           | -28.66, -11.44 | <b>&lt;0.001</b> |
| 36-week 5xFAD – K-9 vs. 18-week wild-type   | -1.842           | -10.44, 6.76   | 0.85             |
